# Supplementary material for: Embryonic origins of forebrain oligodendrocytes revisited by combinatorial genetic fate mapping
Source: eLife journal article supplement (doi:10.7554/elife.95406), 2024-04-10
Supplement: fig1-data1 [file Figure1-Source Data1 Raw unedited blot for Figure1B.pdf › Figure1-Source Data1/Figure1-Source Data1 Raw unedited blot for Figure1B.pdf]

KI 264-5 arm v

KI 264-3 arm v

0

1 cm

2

3

4

5

6

7

8

9
