# Supplementary material for: Embryonic origins of forebrain oligodendrocytes revisited by combinatorial genetic fate mapping
Source: eLife. 2024 Sep 11;13:RP95406. doi: 10.7554/eLife.95406 (PMC11390105; doi:10.7554/eLife.95406)
Supplement: Figure 1—source data 5. [file elife-95406-fig1-data5.xlsx]

## Sheet: Fig1F
HG-FRT							TRE-RFP
NCx							NCx
	animal1	animal2	animal3	Mean	SEM			animal1	animal2	animal3	Mean	SEM
GFP+	1873	2180	1877				RFP+	166	169	214
CC1+	2087	2308	1976				CC1+	734	945	865
GFP+CC1+	1873	2180	1877				RFP+CC1+	166	169	214
GFP+CC1+/GFP+(%)	100	100	100	100	0		RFP+CC1+/RFP(%)	100	100	100	100	0
GFP+CC+/CC1+(%)	89.746	94.4541	94.9899	93.0647	1.66453		RFP+CC1+/CC1+(%)	22.6158	17.8836	24.7399	21.7464	2.02641
Pir							Pir
	animal1	animal2	animal3	Mean	SEM			animal1	animal2	animal3	Mean	SEM
GFP+	1170	1559	1092				RFP+	160	50	103
CC1+	1303	1682	1185				CC1+	964	434	530
GFP+CC1+	1170	1559	1092				RFP+CC1+	160	50	103
GFP+CC1+/GFP+(%)	100	100	100	100	0		RFP+CC1+/RFP(%)	100	100	100	100	0
GFP+CC+/CC1+(%)	89.7928	92.6873	92.1519	91.5431	0.890051		RFP+CC1+/CC1+(%)	16.5975	11.5207	19.434	15.8507	2.31467
cc							cc
	animal1	animal2	animal3	Mean	SEM			animal1	animal2	animal3	Mean	SEM
GFP+	1633	968	1142				RFP+	411	170	165
CC1+	1807	1005	1206				CC1+	2187	1294	959
GFP+CC1+	1633	968	1142				RFP+CC1+	411	170	165
GFP+CC1+/GFP+(%)	100	100	100	100	0		RFP+CC1+/RFP(%)	16.27	100	100	100	0
GFP+CC+/CC1+(%)	90.3708	96.3184	94.6932	93.7939	1.77506		RFP+CC1+/CC1+(%)	18.7929	13.1376	17.2054	16.3786	1.68408
ac							ac
	animal1	animal2	animal3	Mean	SEM			animal1	animal2	animal3	Mean	SEM
GFP+	448	479	565				RFP+	296	230	154
CC1+	484	491	595				CC1+	1214	1036	953
GFP+CC1+	448	479	565				RFP+CC1+	296	230	154
GFP+CC1+/GFP+(%)	100	100	100	100	0		RFP+CC1+/RFP(%)	100	100	100	100	0
GFP+CC+/CC1+(%)	92.562	97.556	94.958	95.0247	1.44261		RFP+CC1+/CC1+(%)	24.3822	22.47	16.1595	21.0039	2.48431
