# Supplementary material for: Embryonic origins of forebrain oligodendrocytes revisited by combinatorial genetic fate mapping
Source: eLife. 2024 Sep 11;13:RP95406. doi: 10.7554/eLife.95406 (PMC11390105; doi:10.7554/eLife.95406)
Supplement: Figure 2—figure supplement 2—source data 1. [file elife-95406-fig2-figsupp2-data1.xlsx]

## Sheet: Fig 2-Figure Supplementary 2-F
Density/mm^2	dOL							lcOL							mpOL
		animal1	animal2	animal3	Mean	SEM			animal1	animal2	animal3	Mean	SEM			animal1	animal2	animal3	animal4	Mean	SEM
	1	396.404	497.415	401.245	431.7	32.89		1	24.3741	22.7369	12.2179	19.78	3.809		1	10.2483	15.2096	9.63604	16.0066	12.78	1.648
	2	419.372	488.507	462.408	456.8	20.16		2	24.0158	24.789	15.8286	21.54	2.867		2	12.5343	17.8786	13.2531	16.8959	15.14	1.321
	3	449.261	510.835	464.926	475	18.48		3	25.4328	23.5523	15.6117	21.53	3.01		3	13.5184	16.6474	12.657	12.0248	13.71	1.025
	4	440.982	535.749	458.103	478.3	29.16		4	22.6611	21.1068	18.2256	20.66	1.299		4	11.9308	15.7214	11.211	7.82569	11.67	1.619
	5	439.836	581.842	441.643	487.8	47.04		5	20.6072	24.3557	20.4891	21.82	1.27		5	7.75648	12.061	9.78651	4.02568	8.407	1.705
	6	433.222	465.751	424.079	441	12.65		6	14.4501	21.4262	17.1949	17.69	2.029		6	5.49677	10.3245	5.65682	3.71097	6.297	1.413
	7	464.349	476.191	521.579	487.4	17.44		7	11.9769	12.6743	9.40354	11.35	0.9946		7	4.38891	10.1368	5.13759	2.38537	5.512	1.647

## Sheet: Fig 2-Figure Supplementary 2-G
RFP+/ASPA+(%)	dOL							lcOL							mpOL								ASPA
		animal1	animal1	animal3	Mean	SEM			animal1	animal2	animal3	Mean	SEM			animal1	animal2	animal3	animal4	Mean	SEM			animal1	animal2	animal3	animal4	Mean	SEM
	layer1	1.12186	1.72447	1.36862	1.40498	0.174905		layer1	0.464598	0.777143	1.2665	0.836082	0.233359		layer1	0.606493	3.07612	0.38548	0.10627	1.04359	0.685195		layer1	1.3858	1.81297	1.26656	1.07091	1.38406	0.157014
	layer2/3	10.6566	12.4919	12.5877	11.9121	0.628339		layer2/3	15.3875	14.2629	13.3657	14.3387	0.584873		layer2/3	19.6575	17.5443	19.4989	7.97024	16.1677	2.77442		layer2/3	13.1123	13.9535	12.275	11.9244	12.8163	0.453622
	layer4	16.152	16.0376	15.4438	15.8778	0.21949		layer4	19.2715	17.3943	18.27	18.3119	0.542312		layer4	47.4492	36.0792	46.4182	49.8406	44.9468	3.04151		layer4	16.7087	18.2599	18.3782	17.732	17.7697	0.380536
	layer5	28.9656	28.7211	29.2823	28.9896	0.162453		layer5	28.2104	27.7257	27.7014	27.8792	0.165748		layer5	25.9365	31.2044	28.2043	33.1562	29.6253	1.59654		layer5	28.6349	29.5804	28.1666	28.1461	28.632	0.335671
	layer6	43.1039	41.025	41.3175	41.8155	0.649718		layer6	36.666	39.84	39.3964	38.6341	0.992346		layer6	6.35034	12.0959	5.49309	8.92667	8.21651	1.48475		layer6	40.1583	36.3932	39.9137	41.1265	39.3979	1.03523
