# Supplementary material for: Embryonic origins of forebrain oligodendrocytes revisited by combinatorial genetic fate mapping
Source: eLife. 2024 Sep 11;13:RP95406. doi: 10.7554/eLife.95406 (PMC11390105; doi:10.7554/eLife.95406)
Supplement: Figure 2—source data 1. [file elife-95406-fig2-data1.xlsx]

## Sheet: Fig2G-I
Density/mm^2	dOL							lcOL							mpOL
		animal1	animal2	animal3	Mean	SEM			animal1	animal2	animal3	Mean	SEM			animal1	animal2	animal3	animal4	Mean	SEM
	Mo	464.752	550.872	497.923	504.5	25.08		Mo	6.33553	5.67646	4.01026	5.341	0.6919		Mo	6.68347	10.2096	8.37123	4.59462	7.465	1.197
	SS	501.332	562.618	489.963	518	22.56		SS	24.4175	23.4982	16.9547	21.62	2.349		SS	14.028	19.8987	14.6252	14.6454	15.8	1.374
	Pir	133.389	118.217	90.7827	114.1	12.47		Pir	139.496	217.655	158.002	171.7	23.58		Pir	16.3344	22.9327	17.4122	11.6065	16.41	2.385

## Sheet: Fig2J
RFP+/ASPA+(%)	Mo								SS								Pir
	dOL								dOL								dOL
		animal1	animal2	animal3	Mean	SEM				animal1	animal2	animal3	Mean	SEM				animal1	animal2	animal3	Mean	SEM
	RFP+	53338	62689	46058					RFP+	83940	127838	107666					RFP+	7237	8595	5965
	ASPA+	54570	67695	48303					ASPA+	87313	140560	120148					ASPA+	19730	20281	19328
	RFP+/ASPA+(%)	97.7423	92.6051	95.3523	95.23	1.484			RFP+/ASPA+(%)	96.1369	90.9491	89.6111	92.23	1.99			RFP+/ASPA+(%)	36.6802	42.3796	30.862	36.64	3.325
	lcOL								lcOL								lcOL
		animal1	animal2	animal3	Mean	SEM				animal1	animal2	animal3	Mean	SEM				animal1	animal2	animal3	Mean	SEM
	RFP+	753	379	76					RFP+	5381	4096	3712					RFP+	9111	11332	10094
	ASPA+	69300	48739.8	12615					ASPA+	182715	126601	104432					ASPA+	17917	18072	17209
	RFP+/ASPA+(%)	1.08658	0.777598	0.602457	0.8222	0.1415			RFP+/ASPA+(%)	2.94502	3.23537	3.55447	3.245	0.176			RFP+/ASPA+(%)	50.8511	62.7047	58.6554	57.4	3.479
	mpOL								mpOL								mpOL
		animal1	animal2	animal3	animal4	Mean	SEM			animal1	animal2	animal3	animal4	Mean	SEM			animal1	animal2	animal3	animal4	Mean	SEM
	RFP+	1015	95	779	848				RFP+	3034	1839	2191	3836				RFP+	932	272	1393	1321
	ASPA+	72817	33463	53828	38089				ASPA+	126723	147448	76765	90154				ASPA+	19532	22448	20751	12479
	RFP+/ASPA+(%)	1.39391	0.283896	1.4472	2.22636	1.338	0.3995		RFP+/ASPA+(%)	2.3942	1.24722	2.85417	4.25494	2.688	0.6222		RFP+/ASPA+(%)	4.77166	1.21169	6.71293	10.5858	5.821	1.955

## Sheet: Fig2N
RFP+/ASPA+(%)	ccm								ccl								ac
	dOL								dOL								dOL
		animal1	animal2	animal3	Mean	SEM				animal1	animal2	animal3	Mean	SEM				animal1	animal2	animal3	Mean	SEM
	RFP	2418	2025	1593					RFP	2191	1352	1665					RFP	205	248	75
	ASPA	2651	2118	1770					ASPA	2561	1399	1908					ASPA	2817	2882	3933
	RFP+/ASPA+(%)	91.2109	95.6091	90	92.27	1.704			RFP+/ASPA+(%)	85.5525	96.6405	87.2642	89.82	3.446			RFP+/ASPA+(%)	7.27725	8.60514	1.90694	5.93	2.048
	lcOL								lcOL								lcOL
		animal1	animal2	animal3	Mean	SEM				animal1	animal2	animal3	Mean	SEM				animal1	animal2	animal3	Mean	SEM
	RFP	3	61	3					RFP	391	342	121					RFP	3982	2979	1996
	ASPA	2188	2584	1638					ASPA	2836	2379	1186					ASPA	5572	3513	3344
	RFP+/ASPA+(%)	0.137112	2.36068	0.18315	0.8936	0.7336			RFP+/ASPA+(%)	13.787	14.3758	10.2024	12.79	1.304			RFP+/ASPA+(%)	71.4645	84.7993	59.689	71.98	7.253
	mpOL								mpOL								mpOL
		animal1	animal2	animal3	animal4	Mean	SEM			animal1	animal2	animal3	animal4	Mean	SEM			animal1	animal2	animal3	animal4	Mean	SEM
	RFP	6	2	95	110				RFP	0	0	2	1				RFP	1858	2007	882	760
	ASPA	3429	2083	1469	1847				ASPA	2308	1428	1400	1064				ASPA	7568	5921	2846	2535
	RFP+/ASPA+(%)	0.174978	0.0960154	6.46698	5.9556	3.173	1.757		RFP+/ASPA+(%)	0	0	0.142857	0.093985	0.05921	0.03561		RFP+/ASPA+(%)	24.5507	33.8963	30.9909	29.9803	29.85	1.953
