# Supplementary figures and images for: Embryonic origins of forebrain oligodendrocytes revisited by combinatorial genetic fate mapping
Source: eLife journal article supplement (doi:10.7554/elife.95406), 2024-04-10

0  
1 cm  
2  
3  
4  
5  
6  
7  
8

**BamHI**

**Opalin** WT/WT Tg/WT

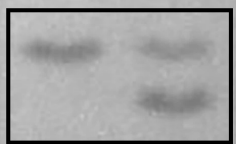

**NdeI**

**Opalin** WT/WT Tg/WT

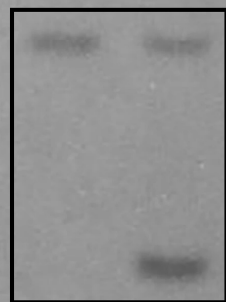

Supplement: fig1-data2 [file Figure1-Source Data1 Uncropped and labeled blot for Figure1B.pdf › Figure1-Source Data2/Figure1-Source Data1 Uncropped and labeled blot for Figure1B.pdf]

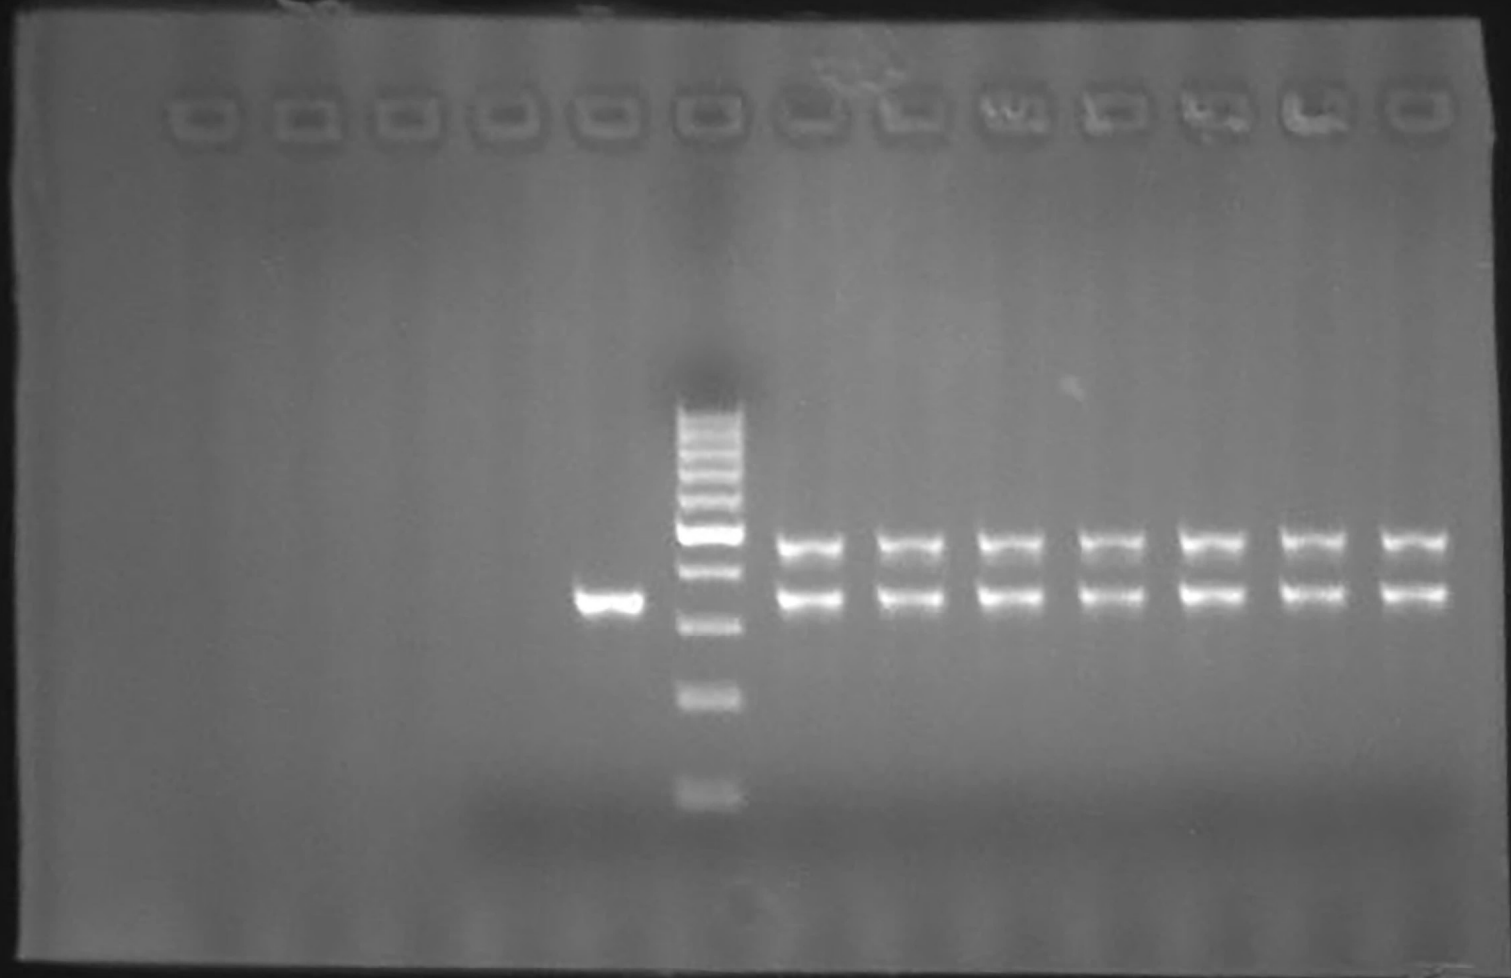

Supplement: fig1-data3 [file Figure1-Source Data1 Raw unedited gel for Figure1C.pdf › Figure1-Source Data3/Figure1-Source Data1 Raw unedited gel for Figure1C.pdf]

**Opalin** *WT/WT* *Flp/WT*

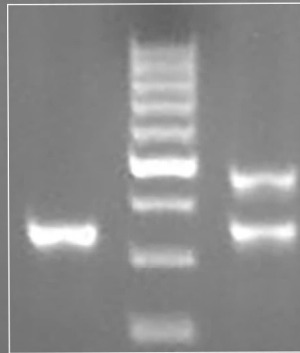

Supplement: fig1-data4 [file Figure1-Source Data1 Uncropped and labeled gel for Figure1C.pdf › Figure1-Source Data4/Figure1-Source Data1 Uncropped and labeled gel for Figure1C.pdf]
